# Supplementary material
Source: publisher site journal article supplement (https://www.e-cmh.org/upload/media/cmh-2023-0057-Supplementary-Fig-9.pdf)
Supplement: Supplementary file 1 [file cmh-2023-0057-Supplementary-Fig-9.pdf]

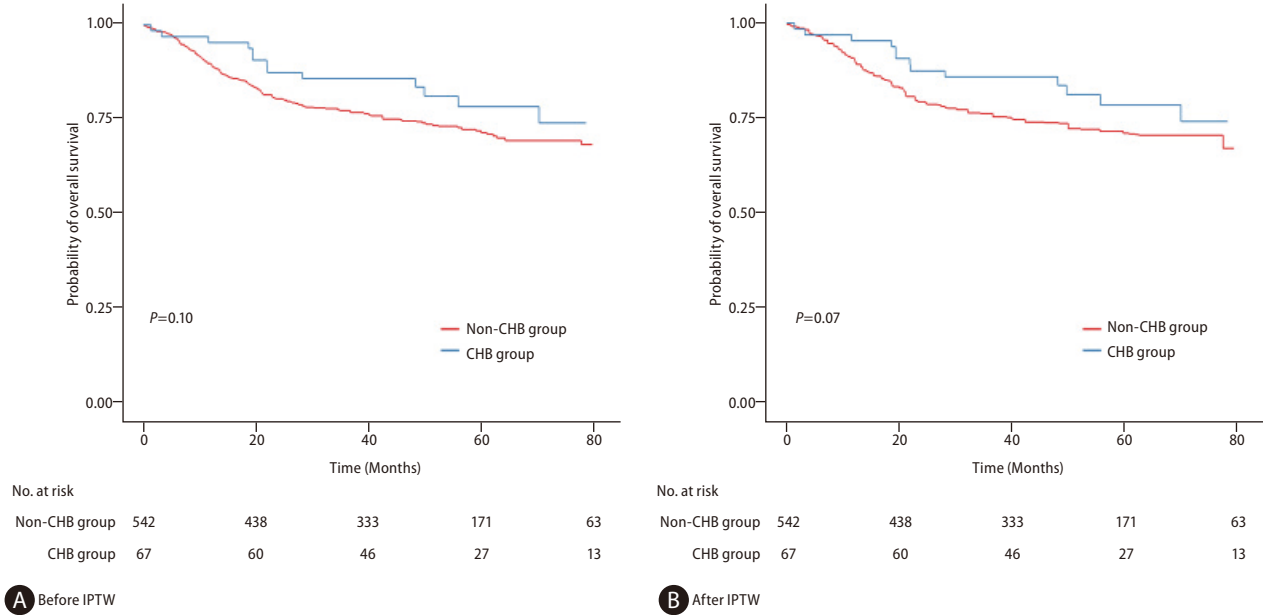

**Supplementary Figure 9.** Kaplan–Meier estimates of OS according to HBV infection status (A) before and (B) after IPTW in the SNUH sub-cohort. Propensity scores of inverse probability of treatment weighting were computed using age, sex, Ann Arbor classification, International Prognostic Index risk, germinal center B cell subtype, lactate dehydrogenase, presence of extranodal lesions, bone marrow involvement, and cirrhosis. CHB, chronic hepatitis B; HBV, hepatitis B virus; OS, overall survival; SNUH; Seoul National University Hospital.
